RESEARCH ARTICLE

# Phylogenetic conservation of substrate use specialization in leaf litter bacteria

Kristin L. Dolan<sup>1\*</sup>, Jeniffer Peña, Steven D. Allison, Jennifer B. H. Martiny

Department of Ecology and Evolutionary Biology, University of California-Irvine, Irvine, California, United States of America

✉ Current address: Research Development Office, University of California-San Francisco, San Francisco, California, United States of America

\* [kristin.dolan@ucsf.edu](mailto:kristin.dolan@ucsf.edu)

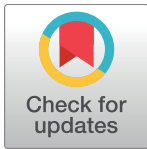

**OPEN ACCESS**

**Citation:** Dolan KL, Peña J, Allison SD, Martiny JBH (2017) Phylogenetic conservation of substrate use specialization in leaf litter bacteria. PLoS ONE 12 (3): e0174472. <https://doi.org/10.1371/journal.pone.0174472>

**Editor:** Jeffrey L Blanchard, University of Massachusetts, UNITED STATES

**Received:** October 14, 2016

**Accepted:** March 9, 2017

**Published:** March 30, 2017

**Copyright:** © 2017 Dolan et al. This is an open access article distributed under the terms of the [Creative Commons Attribution License](https://creativecommons.org/licenses/by/4.0/), which permits unrestricted use, distribution, and reproduction in any medium, provided the original author and source are credited.

**Data Availability Statement:** Isolate sequence data are available on the GenBank database (accession numbers listed in Table 1). Biolog and respiration data are within the paper and its Supporting Information files; raw data tables are provided as Supporting Information.

**Funding:** The following funders provided support for this study: the National Science Foundation (1126749), the Department of Energy (DE-FG02-10ER64995), and the Department of Education (P200A120144). These grants were received by JBHM, SDA, and KLD respectively. The funders

## Abstract

Environmental change will influence the ecosystem processes regulated by microbial communities, including leaf litter decomposition. To assess how microbial communities and their functioning might respond to increases in temperature, we quantified the distribution of traits related to carbon substrate utilization and temperature sensitivity in leaf litter bacteria isolated from a natural grassland ecosystem in Southern California. The isolates varied substantially in their carbon substrate use, as well as their response to temperature change. To better predict the functioning and responses in natural communities, we also examined if the functional and response traits were phylogenetically patterned or correlated with one another. We found that the distribution of functional traits displayed a phylogenetic pattern, but the sensitivity of the traits to changes in temperature did not. We also did not detect any correlations between carbon substrate use and sensitivity to changes in temperature. Together, these results suggest that information about microbial composition may provide insights to predicting ecosystem function under one temperature, but that these relationships may not hold under new temperature conditions.

## Introduction

Over the next fifty years, southern California is expected to experience a range of environmental changes, including increased temperature, nitrogen deposition, and precipitation variability [1]. While much research has been devoted to predicting how plant communities will respond to these environmental changes, the response of microbial communities remains relatively unknown (but see [2–4]). Microbial communities play a central role in many ecosystem processes, including the terrestrial carbon cycle through mediation of leaf litter decomposition. Indeed, decomposition is the largest driver of carbon transfer from the biosphere to the atmosphere [5] and is performed almost exclusively by fungi and bacteria [6]. Therefore, determining how microbial communities will respond to changing environmental conditions may improve predictions of future ecosystem carbon cycling.

One approach to linking microbial composition, ecosystem functioning, and environmental change is to identify traits that influence the structure and functioning of microbial

provided financial support only, and had no role in study design, data collection and analysis, decision to publish, or preparation of the manuscript.

**Competing interests:** The authors have declared that no competing interests exist.

communities [7–10]. Plant ecologists have proposed dividing such traits into two, non-exclusive types: response and effect traits [11]. Response traits determine how an organism's abundance changes in the face of new environmental conditions. For example, the physiological response of microorganisms to increased temperature has been well documented, and includes elevated rates of enzymatic reactions and respiration (reviewed in [12]), both of which influence decomposition rates. In contrast, effect traits (hereafter “functional” traits as in [13]) are characteristics that influence ecosystem properties or processes such as nutrient cycling and trace gas emissions. Together, knowledge about the response and functional traits of all species in a community may help predict how composition and functioning will shift in response to environmental change [11, 14–18].

For this study, we characterized functional and response traits of bacterial taxa isolated from natural leaf litter communities located in southern California [19]. Bacteria dominate these communities [20], and their composition varies seasonally and in response to environmental change, including drought and nitrogen addition [21]. Furthermore, variation in the microbial composition of these litter communities has been shown to impact the decomposition rate of leaf litter [22, 23], as well as the response of ecosystem process rates to environmental change [24]. Despite these results, the mechanisms underlying why litter bacteria respond to environmental change, and why their composition influences decomposition rates, remain unknown. A quantitative understanding of the functional and response traits of this bacterial community might help to elucidate these mechanisms.

In addition to examining the traits of specific organisms, phylogenetic relatedness of community members could potentially be used to extrapolate trait distributions to the broader community (reviewed in [25, 26]). In particular, more closely related species might, due to sharing a recent common ancestor, possess a more similar suite of traits. Indeed, a number of studies on microbes [27, 28] and plants [29] have shown that the phylogenetic structure of a community is correlated with functioning, although this is not always the case [30]. In addition, the vast majority of carbon-use traits in Bacteria and Archaea appear to be non-randomly distributed, although the depth at which these traits are conserved varies [31]. Response traits can also be patterned by phylogeny, such that perturbed communities consist of more closely related species than would be expected by chance [32, 33]. If functional and response traits in leaf litter bacteria are phylogenetically structured, the composition of a community might help estimate the ecosystem's decomposition rate under varying environmental conditions. In addition to identifying the phylogenetic patterning of traits, correlations between functional and response traits across organisms could also be used to extrapolate trait distributions and predict future process rates.

To determine the distribution of physiological traits in leaf litter microbial communities (Fig 1), we used physiological and metabolic assays to measure substrate use traits in 16 leaf litter bacteria isolates. The bacteria were isolated from a complex grassland leaf litter community; many belong to taxonomic groups that are abundant in whole community sequence data [21]. The assays were repeated along a temperature gradient, yielding functional traits distributions at three different temperatures. By comparing trait values across temperatures, we estimated the temperature response ( $Q_{10}$ ) of each substrate use (functional) trait for each isolate.

We then tested if functional and response traits were phylogenetically conserved. We hypothesized that, like other microorganisms, temperature response of leaf litter bacteria would be more phylogenetically conserved than their functional, substrate use traits [31, 34, 35]. The use of particular carbon substrates is a simple trait that can be enabled by the presence of just one or two genes. Thus, the ability to use these substrates has likely evolved many times, either by lateral transfer or point mutation, and is therefore generally finely conserved amongst

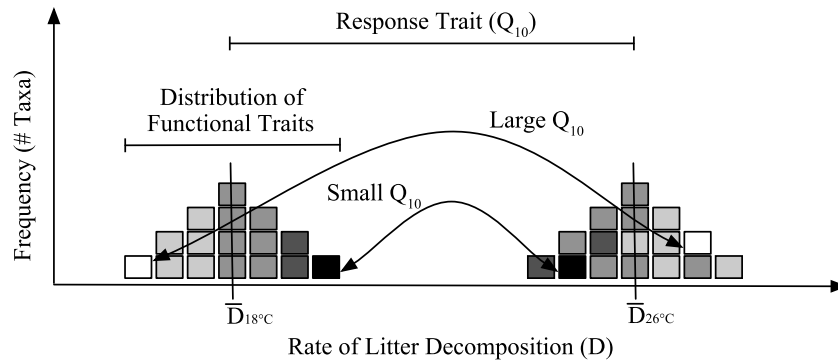

**Fig 1. Theoretical distribution of functional and response traits.** Theoretical distribution of one functional trait, litter decomposition rate (D), and one response trait, temperature sensitivity ( $Q_{10}$ ), for 16 bacterial taxa (each represented by a single square). As seen here, the darkest square, representing a single bacterial taxon, is the best litter degrader at 18°C, but its rate does not shift dramatically at 26°C (small  $Q_{10}$ ). In contrast, the taxon represented by the lightest square is the poorest litter degrader at 18°C but its rate increases substantially at 26°C (large  $Q_{10}$ ). In this case there is a correlation between functional and response traits, such that better litter degraders at 18°C are, on average, less sensitive to changes in temperature.

<https://doi.org/10.1371/journal.pone.0174472.g001>

bacteria [35]. In contrast, the optimal temperature for bacterial growth is presumably determined by a variety of genetic factors.

Lastly, we tested whether the functional and response traits were correlated with one another; a correlation between these traits would suggest a tradeoff between substrate use and temperature sensitivity. Many traits are correlated with one another, especially when physiological trade-offs constrain trait values [36, 37]. We hypothesized that these physiological tradeoffs also exist in leaf litter bacteria. For instance, we expected that taxa that utilize a larger set of substrates (i.e., more generalist life-strategies) would be less sensitive to changes in temperature. Likewise, taxa that utilized fewer substrates (i.e. specialist life-strategies) would be more sensitive to temperature changes.

## Methods

### Strain isolation and identification

The bacterial isolates used in this study were isolated from leaf litter collected from the Loma Ridge research site [19] located 5 km north of Irvine, California, USA (33 44'N, 117 42'W, 365 m elevation) in January, April, July, and September of 2011. During this period, the site was dominated by the annual grass genera *Avena*, *Bromus*, and *Lolium* the annual forb genera *Erodium* and *Lupinus* and the native perennial grass *Nassella pulchra*. The temperatures in this system are moderate, with an average winter (November through April) high of 21.0°C and low of 6.2°C and an average summer (May through October) high of 27.3°C and low of 13.1°C; the mean annual temperature is 17°C.

Once collected, the litter was ground and then washed with sterilized deionized (DI) water. Litter fragments (106–212 μm) were suspended in sterile DI water and the resulting solution was passed through a 100 μm filter (EMD Millipore, Billerica MA), and 20 ml of the filtered litter solution was mixed with 20 ml of 0.6% carboxymethylcellulose solution (an emulsifier). This slurry was then plated onto Luria Broth (LB) agar plates or litter agar plates and allowed to incubate at 21°C for up to two weeks (as described in [24]). Individual colonies were transferred to fresh LB agar plates at least three times to purify the cultures. Prior to the experiments, the cultures were stored at -80°C in a glycerol solution (52% glycerol, 2% MgSO<sub>4</sub>, and 2% Tris-Cl; pH = 7.6).

We identified each bacterial isolate by PCR amplification and Sanger sequencing of the 16S rRNA gene. DNA extract from each isolate was added to a PCR cocktail containing 1.5 units of HotMasterTaq polymerase (5PRIME, Gaithersburg MD) 1x PreMixF (FailSafe), 0.3 μM of each primer (pA: 5' -AGAGTTTGATCCTGGCTCAG-3' and pH: 5' -AAGGAGGTGATCCAGC CGCA-3' [38]), and H<sub>2</sub>O to a final volume of 31 μl. Following an initial denaturation step at 95°C for 4 min, PCR was cycled 30 times at 95°C for 40 sec, 55.5°C for 30 sec, 72°C for 2 min, and a final extension at 72°C for 3 min 30 sec. All PCRs here and below were performed on a PTC-100 thermocycler (Bio-Rad, Hercules CA). The taxonomic identity of each isolate was determined by matching our sequences to the most closely related cultured representative using the BLAST tool in the GenBank database. We further confirmed the taxonomic identities of the isolates using the Ribosomal Database Project (RDP) Naive Bayesian rRNA Classifier (Version 2.11) [39]. We aligned the 16S rRNA sequences using the SINA aligner ([www.arb-silva.de/](http://www.arb-silva.de/) [40]). A maximum likelihood tree was estimated with 100 bootstrap replications using a transition/transversion ratio = 2, a constant base rate variation among sites, and empirical base frequencies using PHYLIP v. 3.68 [41]. A total of 16 isolates were selected for this study because 1) they had already been taxonomically identified and characterized in another study [42], 2) they provided a range of phylogenetic distances, and 3) many belonged to taxonomic groups common in leaf litter bacterial communities [21]. Indeed, in a PCR survey of litter from the same ecosystem [21] found the relative abundance of the genus's represented in this study ranged from 0–18.67% of the samples. A list of the isolates used in this study, including the relative abundance of their respective genus in natural communities, is shown in Table 1.

**Table 1. Bacterial isolates used in this study.**

| Taxonomic Identification                  | Accession Number | Natural Abundance of Genus (%) |
|-------------------------------------------|------------------|--------------------------------|
| <b>Proteobacteria</b>                     |                  |                                |
| <i>Pseudomonas fluorescens</i>            | KF733338         | <0.01                          |
| <i>Pseudomonas synxantha</i>              | KF733328         |                                |
| <i>Pseudomonas sp.</i> (isolate 1)        | KF733329         |                                |
| <i>Pseudomonas sp.</i> (isolate 2)        | KF733330         |                                |
| <i>Erwinia billingiae</i>                 | KF733325         | <0.01                          |
| <i>Duganella zoogloeoides</i> (isolate 1) | KF733339         | NA (4.00)                      |
| <i>Duganella zoogloeoides</i> (isolate 2) | KF733333         |                                |
| <b>Actinobacteria</b>                     |                  |                                |
| <i>Sanguibacter sp.</i>                   | KF733318         | 0.29                           |
| <i>Frigoribacterium sp.</i>               | KF733312         | 15.34                          |
| <i>Schumannella luteola</i>               | KF733311         | NA (36.77)                     |
| <i>Microbacterium sp.</i>                 | KF733319         | 0.01                           |
| <i>Curtobacterium sp.</i>                 | KF733315         | 18.67                          |
| <i>Curtobacterium flaccumfaciens</i>      | KF733308         |                                |
| <b>Bacterioidetes</b>                     |                  |                                |
| <i>Pedobacter borealis</i>                | KF733323         | 3.15                           |
| <i>Flavobacterium sp.</i>                 | KF733322         | 0.78                           |
| <i>Chryseobacterium sp.</i>               | KF733320         | 0.32                           |

The 16 bacterial isolates used in this study, and their corresponding GenBank accession number. If the bacterial genus was detected in natural litter pyrosequencing data [21], the genus' relative abundance ("Natural Abundance") is also shown. If no sequences belonging to the genus were identified, the relative abundance of the family is given in parentheses.

<https://doi.org/10.1371/journal.pone.0174472.t001>

### Simple carbon use assay

Approximately 10 days before each assay, glycerol stocks of 16 bacterial isolates were removed from -80°C and streaked onto LB agar plates. Plates were incubated at room temperatures (roughly 23°C) for approximately 6 days or until single colonies appeared. Single colonies were picked from each culture and inoculated into 25 ml of LB media. To allow for temperature acclimation, liquid cultures were grown with agitation (100 rpm) at each experimental temperature (18°C, 22°C, or 26°C) for 5 days and transferred at least once to new media. On the day of inoculation, each culture was transferred to a 50 ml conical centrifuge tube and centrifuged at 4500 rpm for 10 minutes. The supernatant was discarded and the pellet was re-suspended in sterile saline solution (0.9% NaCl). This washing process was repeated a total of four times to remove residual LB media.

After washing, cultures were diluted in saline solution to achieve an optical density at 600 nm (OD<sub>600</sub>) of 0.100 ± 0.05, and 100 µl of the diluted cell suspension was inoculated into each well of an EcoPlate (Biolog, Hayward CA). EcoPlates contain 31 unique substrates in triplicate plus 3 carbon-free controls in a 96 well-plate format. Through substrate consumption and consequent cellular respiration, an indicator dye is reduced and a purple pigment is produced. After inoculation, plates were incubated at the same temperature used during acclimation (18°C, 22°C, or 26°C) for ten days. Substrate utilization (OD<sub>590</sub>) and bacterial growth (turbidity; OD<sub>750</sub>) were assessed at time 0, and 1, 2, 3, 5, 7, and 10 days using an automated Synergy 4 (BioTek, Winooski VT) microplate reader (Fig 2A). A substrate was considered utilized if the OD<sub>590</sub> (mean based on three replicates) after 10 days was ≥0.30, which exceeded the maximum OD<sub>590</sub> of the substrate-free controls (S1 Dataset). *Sanguibacter* sp. was removed from all EcoPlate analyses due to the development of pigment in negative control wells.

To estimate growth parameters, we fit the substrate utilization data to a modified Gompertz equation:

$$y = A \exp \left\{ -\exp \left[ \frac{\mu_{max} e}{A} (\lambda - t) + 1 \right] \right\} + y_0$$

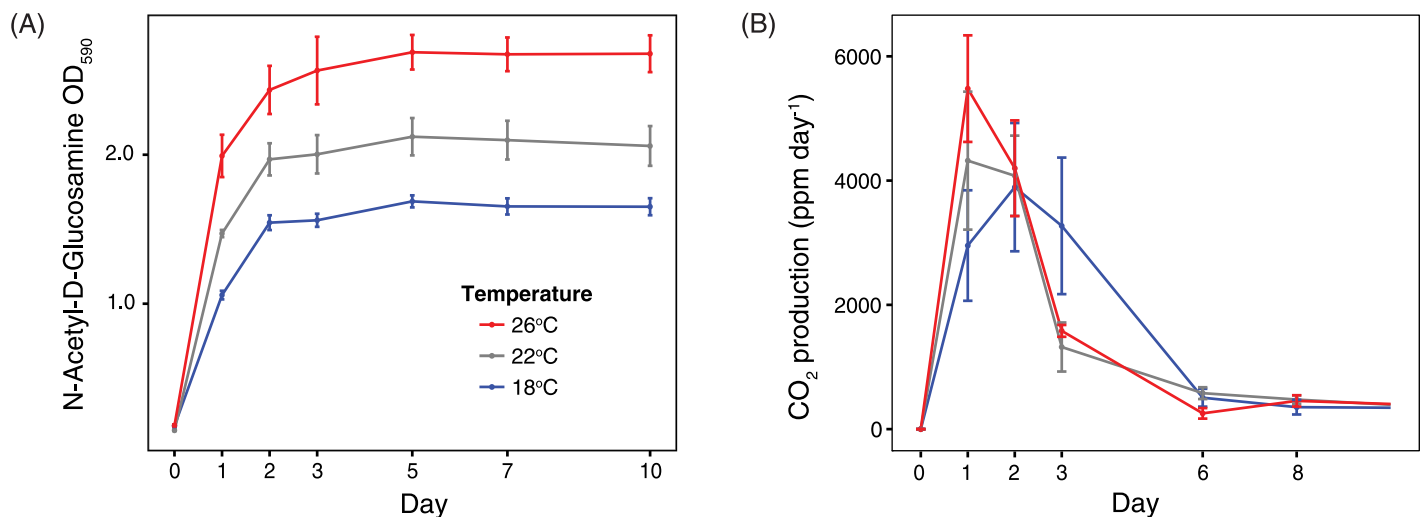

**Fig 2. Sample EcoPlate and CO<sub>2</sub> production data.** The effect of temperature on *Erwinia billingiae*'s (A) ability to utilize the EcoPlate substrate N-acetyl-D-glucosamine and (B) mineralize leaf litter C. Each value plotted is mean (± SEM) based on three replicates.

<https://doi.org/10.1371/journal.pone.0174472.g002>

where  $y$  is cell density (or in this case mean OD<sub>590</sub> of a particular substrate),  $A$  is the carrying capacity,  $\mu_{\max}$  is maximum growth rate, and  $\lambda$  is the lag time between inoculation and the initiation of exponential growth, and  $y_0$  is the initial inoculation density [43].

The response of bacterial growth to temperature was determined for every utilized substrate by calculating the  $Q_{10}$ , the factor by which a biological process increases in rate for every 10°C change in temperature, based on  $\mu_{\max}$  values:

$$Q_{10-\mu_{\max}} = \left( \frac{\mu_{18^{\circ}\text{C}}}{\mu_{26^{\circ}\text{C}}} \right)^{\left( \frac{10}{26^{\circ}\text{C}-18^{\circ}\text{C}} \right)}$$

where  $\mu_{18^{\circ}\text{C}}$  and  $\mu_{26^{\circ}\text{C}}$  are the estimated  $\mu_{\max}$  for the coldest (18°C) and warmest (26°C) incubation temperatures. To determine the sensitivity of substrate yield,  $Q_{10\text{-OD}_{590}}$  values were calculated using the mean final OD<sub>590</sub> value after 10 days. While most  $Q_{10}$  values were in the biologically relevant range, there were a few instances where a substrate was utilized at 26°C and not at 18°C. This produced an inflated  $Q_{10}$  value that is not easily comparable to the other  $Q_{10}$  data.

To test if the similarity of substrate use or temperature sensitivity was correlated with phylogenetic distance, we performed Mantel tests based on 999 permutations. Specifically, we compared the bacterial phylogenetic distance matrix with euclidean distance matrices of substrate usage (substrate use richness, mean OD<sub>590</sub>, or mean  $\mu_{\max}$ ) or temperature sensitivity ( $Q_{10-\mu_{\max}}$  or  $Q_{10\text{-OD}_{590}}$ ). The mean OD<sub>590</sub> and mean  $\mu_{\max}$  represented the mean value across all three temperature treatments.

## Complex litter use experiment

Leaf litter (comprised of roughly 12% lignin, 48% cellulose, 33% hemicellulose, 4% crude protein, and 3% ethanol soluble carbohydrates [44] from the Loma Ridge site was collected in the summer of 2010, ground in a Wiley mill to pass a #20 mesh screen, and sterilized with roughly 23 kGy of gamma irradiation and autoclaving for 30 minutes. Sterilized litter (50 mg) was then added to each microcosm, an autoclaved glass vial (40 ml) with a sampling septum containing 4 g sterile sand. One culture (100 µl of the diluted cell suspension with 700 µl of saline solution) was slowly pipetted into each microcosm. Microcosms were placed in large plastic containers to keep humidity near 100% and stored at either 18°C, 22°C, or 26°C. Each isolate ( $n = 16$ ) and temperature ( $n = 3$ ) combination contained three replicate microcosms for a total of 144 microcosms.

CO<sub>2</sub> concentrations in the microcosm headspace were measured on days 1, 2, 3, 6, 8, and 10 to estimate cumulative CO<sub>2</sub> production, our metric for litter decomposition (Fig 2B; S1 Dataset). To keep the microcosms at atmospheric CO<sub>2</sub> concentrations, the vial caps were kept loose except for 24 hours before each sampling. For each measurement, an 8 ml subsample of headspace gas was withdrawn by syringe and injected into an infrared gas analyzer (PP-Systems EGM-4). To determine the temperature responses of leaf litter decomposition, we compared the time required for the 40 ml vial to reach a concentration of 5000 ppm of CO<sub>2</sub> at 18°C, 22°C, and 26°C, which corresponded to approximately 0.2% of litter carbon respired. Following an approach by Conant, Drijber, et al. [45], we estimated the  $Q_{10}$  of litter decomposition by dividing the time taken to respire 5000 ppm of CO<sub>2</sub> at the coldest temperature ( $t_{18^{\circ}\text{C}}$ ) by time taken at the warmest temperature ( $t_{26^{\circ}\text{C}}$ ) and correcting for the actual incubation

temperature differential (26°C–18°C):

$$Q_{10} = \left( \frac{t_{18^\circ\text{C}}}{t_{26^\circ\text{C}}} \right)^{\left( \frac{10}{26^\circ\text{C} - 18^\circ\text{C}} \right)}$$

## Additional statistical analyses

Because the main effect of temperature on substrate usage and litter decomposition was non-linear, we used a mixed model ANOVA to analyze the effect of isolate, temperature, their interaction, and substrate (when applicable) on respiration, substrate use richness, OD<sub>590</sub>, and  $\mu_{\text{max}}$ . Isolate and substrate were treated as random factors and temperature as a fixed, categorical factor. We assessed the phylogenetic signal of functional and response traits among bacterial isolates using 999 permutations of Bloomberg's K statistic as encoded in the R package 'picante'. The input tree for all phylogenetic analyses was a maximum likelihood tree estimated from original alignment using the majority consensus tree of 100 bootstrap runs as a topological guide. To visualize general trends across the isolates, we organized the functional and response trait data into a single 7 trait x 15 isolate matrix (*Sanguibacter sp.* removed). Trait variables were normalized to a similar mean and variance, and Euclidean distances were calculated between all isolates. We then performed a Principal Component Analysis (PCA) and plotted the first two axes with a Pearson correlation overlay. The PCA identified 7 components of variance, which each explained between 1.1–43.6% of the total variance. The first two components, PCA1 and PCA2, accounted for 68% of total variance and are plotted in [S4 Fig](#).

## Results

### Substrate use traits

Grassland litter bacteria varied greatly in their functional traits, as measured by their use of simple substrates and complex leaf litter ([Fig 3](#)). We first compared the ability of each isolate to use the 31 substrates on the EcoPlates ([Table 2](#)). All but two substrates, 2-hydroxy benzoic acid and phenylethylamine, were used by at least one isolate. At the intermediate temperature (22°C), the isolates used an average of 11.6 substrates. The breadth of this use ranged greatly, between 0 and 24 substrates depending on the isolate ([S1 Fig](#)). Two Actinobacteria isolates, *Schumannella luteola* and a *Frigoribacterium sp.*, did not use any of the substrates ([S1 Fig](#)). The most commonly utilized substrates were the carboxylic acids pyruvic acid methyl ester, D-galacturonic acid, and glycyl-L-glutamic acid ([Table 3](#)).

Beyond binary use, we assayed the degree to which the isolates could use each substrate by estimating growth rate ( $\mu_{\text{max}}$ ) and comparing a metric of cumulative substrate use (OD<sub>590</sub> on day 10). Across all substrates, the isolates differed in both growth rate and cumulative substrate use ( $p < 0.001$ ; [Table 2](#); [Fig 3a](#)). For instance, the ability of *Pseudomonas sp.* (isolate 1) to utilize pyruvic acid methyl ester at 26°C was 10x greater than *Pseudomonas synxantha* ( $\mu_{\text{max}} = 4.67$  and 0.467, respectively).

Similar to the simple substrates, the litter bacteria varied substantively in their abilities to decompose complex leaf litter ([Table 2](#)). Decomposition rates, measured as cumulative CO<sub>2</sub> production, ranged from ~5,500–23,500 ppm CO<sub>2</sub> during the 10 day period ([Figs 3b](#) and [4](#)). These values corresponded to 0.22–0.94% of litter carbon respired.

### Response to temperature

Generally, the number of substrates utilized by the isolates depended on the temperature of the assay. The median number of simple substrates used by each isolate was highest at the intermediate temperature 22°C ( $n = 13$ ) and declined to 10 substrates at 18°C and 9 substrates

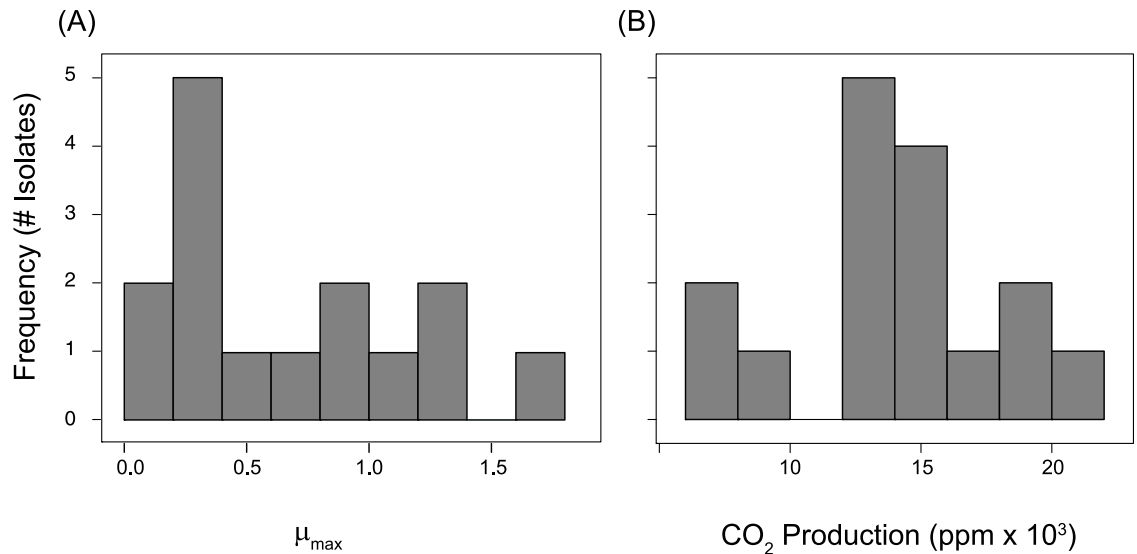

**Fig 3. Distribution of functional traits.** The distribution of two functional traits for all bacterial isolates: (A) maximum potential growth rate ( $\mu_{max}$ ) on EcoPlate substrates, and (B)  $CO_2$  production from the mineralization of leaf litter C. All functional traits are based on the mean value across all temperatures and, when applicable, EcoPlate substrates.

<https://doi.org/10.1371/journal.pone.0174472.g003>

at 26°C (S2 Fig). Mean growth rate ( $\mu_{max}$ ) and substrate use ( $OD_{590}$ ) on the EcoPlates also peaked at 22°C. In addition, isolate and temperature significantly interacted to affect the mean cumulative substrate use ( $OD_{590}$ ; mixed-model ANOVA; Table 2).

We also observed a significant isolate and temperature interaction on  $CO_2$  production rates (Table 2; S3 Fig); decomposition rates were generally highest at 26°C, but the mean rate at 22°C tended to be lower than at 18°C (Fig 4).

### Phylogenetic signal

We found that a number of the functional traits were phylogenetically conserved. The overall substrate use profile, defined as the suite of simple EcoPlate substrates used by each isolate, was correlated with phylogenetic distance (Mantel Test:  $rM = 0.23$ ). This was also the case when we examined the  $\mu_{max}$  values for the suite of substrates used by each isolate (Mantel Test:  $rM = 0.20$ ; Table 3). Thus, isolates that were more closely related shared more similar carbon use patterns and grew at similar growth rates. In addition, the average  $\mu_{max}$  across all utilized substrates was also strongly conserved among isolates (K-statistic: 0.44,  $p = 0.002$ ), and was generally highest in Proteobacteria and lower in Actinobacteria (Fig 5). While the number of

**Table 2. ANOVA results for functional traits.**

| Source of variation | $OD_{590}$ |       |        | $\mu_{max}$ |       |        | $CO_2$ production |       |        |
|---------------------|------------|-------|--------|-------------|-------|--------|-------------------|-------|--------|
|                     | df         | Chisq | P      | df          | Chisq | P      | df                | Chisq | P      |
| Substrate           | 1          | 162.2 | <0.001 | 1           | 85.6  | <0.001 | NA                | NA    | NA     |
| Isolate             | 1          | 33.6  | <0.001 | 1           | 21.1  | <0.001 | 1                 | 15.3  | <0.001 |
| Temperature         | 2          | 12.7  | 0.002  | 2           | 13.6  | 0.001  | 1                 | 10.1  | 0.006  |
| Isolate*Temperature | 1          | 7.9   | 0.005  | 1           | 0.4   | 0.6    | 1                 | 7.1   | 0.008  |

Overall mixed-model ANOVA results for factors affecting substrate use ( $OD_{590}$ ), growth rate ( $\mu_{max}$ ), and  $CO_2$  production rates. Substrate and Isolate terms are treated as random factors, while the Temperature term is treated as a fixed factor.

<https://doi.org/10.1371/journal.pone.0174472.t002>



**Table 3. Results for each Biolog EcoPlate substrate, including the number of isolates that utilized each substrate and Bloomberg K-statistics.**

| Biolog EcoPlate Substrate   | Isolate Richness | OD <sub>590</sub> | μ <sub>max</sub> | Q <sub>10-μmax</sub> | Q <sub>10-OD590</sub> |
|-----------------------------|------------------|-------------------|------------------|----------------------|-----------------------|
| <b>Amine</b>                |                  |                   |                  |                      |                       |
| Phenylethylamine            | 0                | NA                | NA               | NA                   | NA                    |
| Putrescine                  | 6                | 0.11              | 0.08             | 0.07                 | 0.07                  |
| <b>Amine Acid</b>           |                  |                   |                  |                      |                       |
| L-Arginine                  | 8                | 0.15              | 0.18             | 0.08                 | 0.08                  |
| L-Asparagine                | 9                | 0.15              | <b>0.37**</b>    | 0.07                 | 0.07                  |
| L-Phenylalanine             | 1                | 0.39              | 0.53             | 0.53                 | 0.53                  |
| L-Serine                    | 9                | <b>0.66**</b>     | <b>0.28*</b>     | 0.08                 | 0.24                  |
| L-Threonine                 | 7                | 0.17              | 0.09             | 0.07                 | 0.18                  |
| <b>Carbohydrate</b>         |                  |                   |                  |                      |                       |
| D-Cellobiose                | 11               | 0.1               | 0.24             | 0.05                 | 0.05                  |
| D-Galactonic Acid γ-Lactone | 8                | 0.15              | 0.09             | 0.07                 | 0.07                  |
| D-Mannitol                  | 9                | <b>0.5**</b>      | <b>0.24**</b>    | 0.07                 | 0.09                  |
| D-Xylose                    | 11               | 0.07              | 0.07             | 0.12                 | 0.49                  |
| D,L-α-Glycerol Phosphate    | 8                | <b>0.21*</b>      | <b>0.25*</b>     | 0.05                 | 0.11                  |
| Glucose-1-Phosphate         | 9                | 0.1               | 0.14             | 0.05                 | 0.06                  |
| i-Erythritol                | 5                | 0.1               | 0.09             | 0.14                 | 0.13                  |
| N-Acetyl-D-Glucosamine      | 8                | 0.16              | 0.12             | 0.07                 | 0.08                  |
| α-D-Lactose                 | 7                | 0.03              | 0.14             | 0.04                 | 0.36                  |
| β-Methyl-D-Glucoside        | 6                | 0.11              | 0.18             | <b>0.43*</b>         | 0.08                  |
| <b>Carboxylic Acid</b>      |                  |                   |                  |                      |                       |
| D-Galacturonic Acid         | 12               | 0.07              | <b>0.4*</b>      | 0.07                 | 0.09                  |
| D-Glucosaminic Acid         | 6                | 0.16              | 0.1              | 0.23                 | 0.1                   |
| D-Malic Acid                | 8                | 0.08              | 0.1              | 0.01                 | 0.01                  |
| Glycyl-L-Glutamic Acid      | 12               | <b>0.27*</b>      |                  |                      | 0.07                  |
| Itaconic Acid               | 7                | 0.06              | 0.07             | 0.06                 | 0.07                  |
| Pyruvic Acid Methyl Ester   | 12               | 0.08              | 0.18             | 0.23                 | 0.1                   |
| α-Ketobutyric Acid          | 1                | <b>0.39*</b>      | 0.53             | 0.53                 | 0.53                  |
| γ-Hydroxybutyric Acid       | 4                | 0.07              | 0.07             | 0.06                 | 0.06                  |
| <b>Phenolic Compound</b>    |                  |                   |                  |                      |                       |
| 2-Hydroxy Benzoic Acid      | 0                | NA                | NA               | NA                   | NA                    |
| 4-Hydroxy Benzoic Acid      | 5                | 0.11              | 0.11             | 0.05                 | 0.06                  |
| <b>Polymer</b>              |                  |                   |                  |                      |                       |
| Glycogen                    | 5                | 0.02              | 0.02             | 0.44                 | <b>0.51*</b>          |
| Tween 40                    | 11               | 0.09              | 0.27             | 0.05                 | 0.1                   |
| Tween 80                    | 8                | 0.09              | 0.04             | 0.07                 | 0.04                  |
| α-Cyclodextrin              | 2                | <b>0.42**</b>     | <b>0.65**</b>    | <b>0.63*</b>         | <b>0.59*</b>          |

The Bloomberg's K-statistic tests for a phylogenetic signal of average EcoPlate substrate usage (OD<sub>590</sub>), growth rate (μ<sub>max</sub>), and temperature sensitivities of growth rate (Q<sub>10-μmax</sub>) and maximum (Q<sub>10-OD590</sub>). Asterisks (\*) denote K-statistics that are statistically significant (\* p-value ≤ .05; \*\* p-value ≤ .01).

<https://doi.org/10.1371/journal.pone.0174472.t003>

substrates that each isolate could utilize did not display a phylogenetic pattern (substrate richness, Fig 5), the ability to use particular substrates did; these patterns were consistent if we examined each temperature treatment individually (data not shown) or took the average of all three temperatures (Table 3). For example, mannitol was metabolized by isolates in all three phyla but the maximum potential growth rate (u<sub>max</sub>) was generally higher in isolates belonging to the Proteobacteria phyla. Alternatively, α-cyclodextrin was only utilized by two isolates,

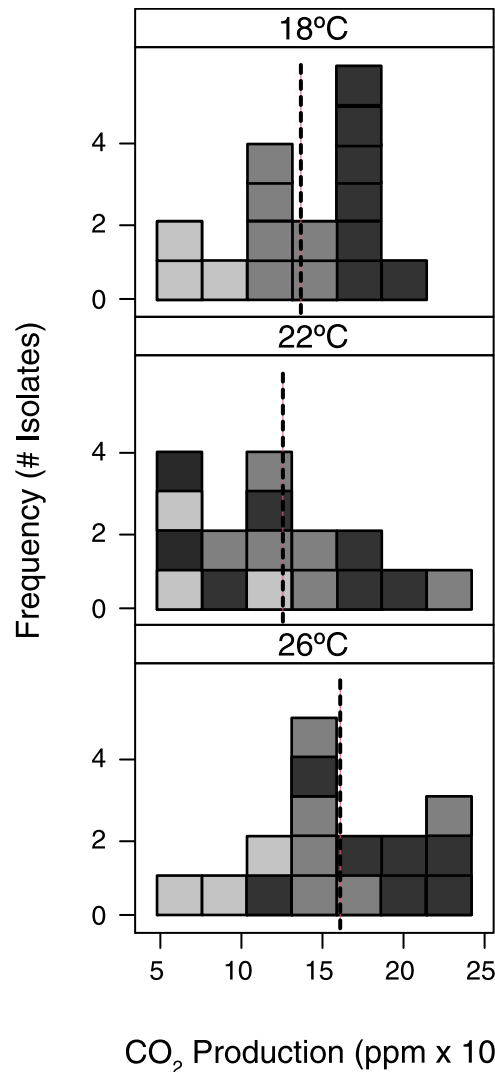

**Fig 4. Distribution of CO<sub>2</sub> production trait.** The distribution of one functional trait, CO<sub>2</sub> production rate, across each temperature treatment. Each box represents the cumulative CO<sub>2</sub> production rate for one bacterial isolate (16 total). Isolates are shaded according to their CO<sub>2</sub> production rate at 18°C, where light and dark shaded boxes are relatively low and high producers at 18°C, respectively. Vertical, dashed line indicate the mean CO<sub>2</sub> production each temperature treatment.

<https://doi.org/10.1371/journal.pone.0174472.g004>

*Pedobacter borealis* and *Chryseobacterium sp.*, both of which belonged to the phylum Bacteroidetes.

The ability to decompose the complex leaf litter also displayed a significant phylogenetic pattern (Fig 5), and this signal remained whether we examined each temperature individually (data not shown) or averaged across temperatures (K-statistic: 0.40,  $p = 0.001$ ). On average, Proteobacteria produced more CO<sub>2</sub> on the leaf litter than Bacteroidetes and Actinobacteria.

Unlike substrate use traits, we found little evidence of a phylogenetic pattern in the sensitivity of taxa to changes in temperature (Fig 5, Table 3). This was the case when we examined the  $Q_{10}$  of CO<sub>2</sub> production rates (K-statistic: 0.042,  $p = 0.80$ ; Fig 5), and the average  $\mu_{\max}$  or OD<sub>590</sub> across all utilized Biolog substrates (K-statistic: 0.28 ( $p = 0.52$ ) and 0.08 ( $p = 0.74$ ), respectively). A few individual substrates did have  $Q_{10}$  values (based on both  $\mu_{\max}$  and OD<sub>590</sub>) that

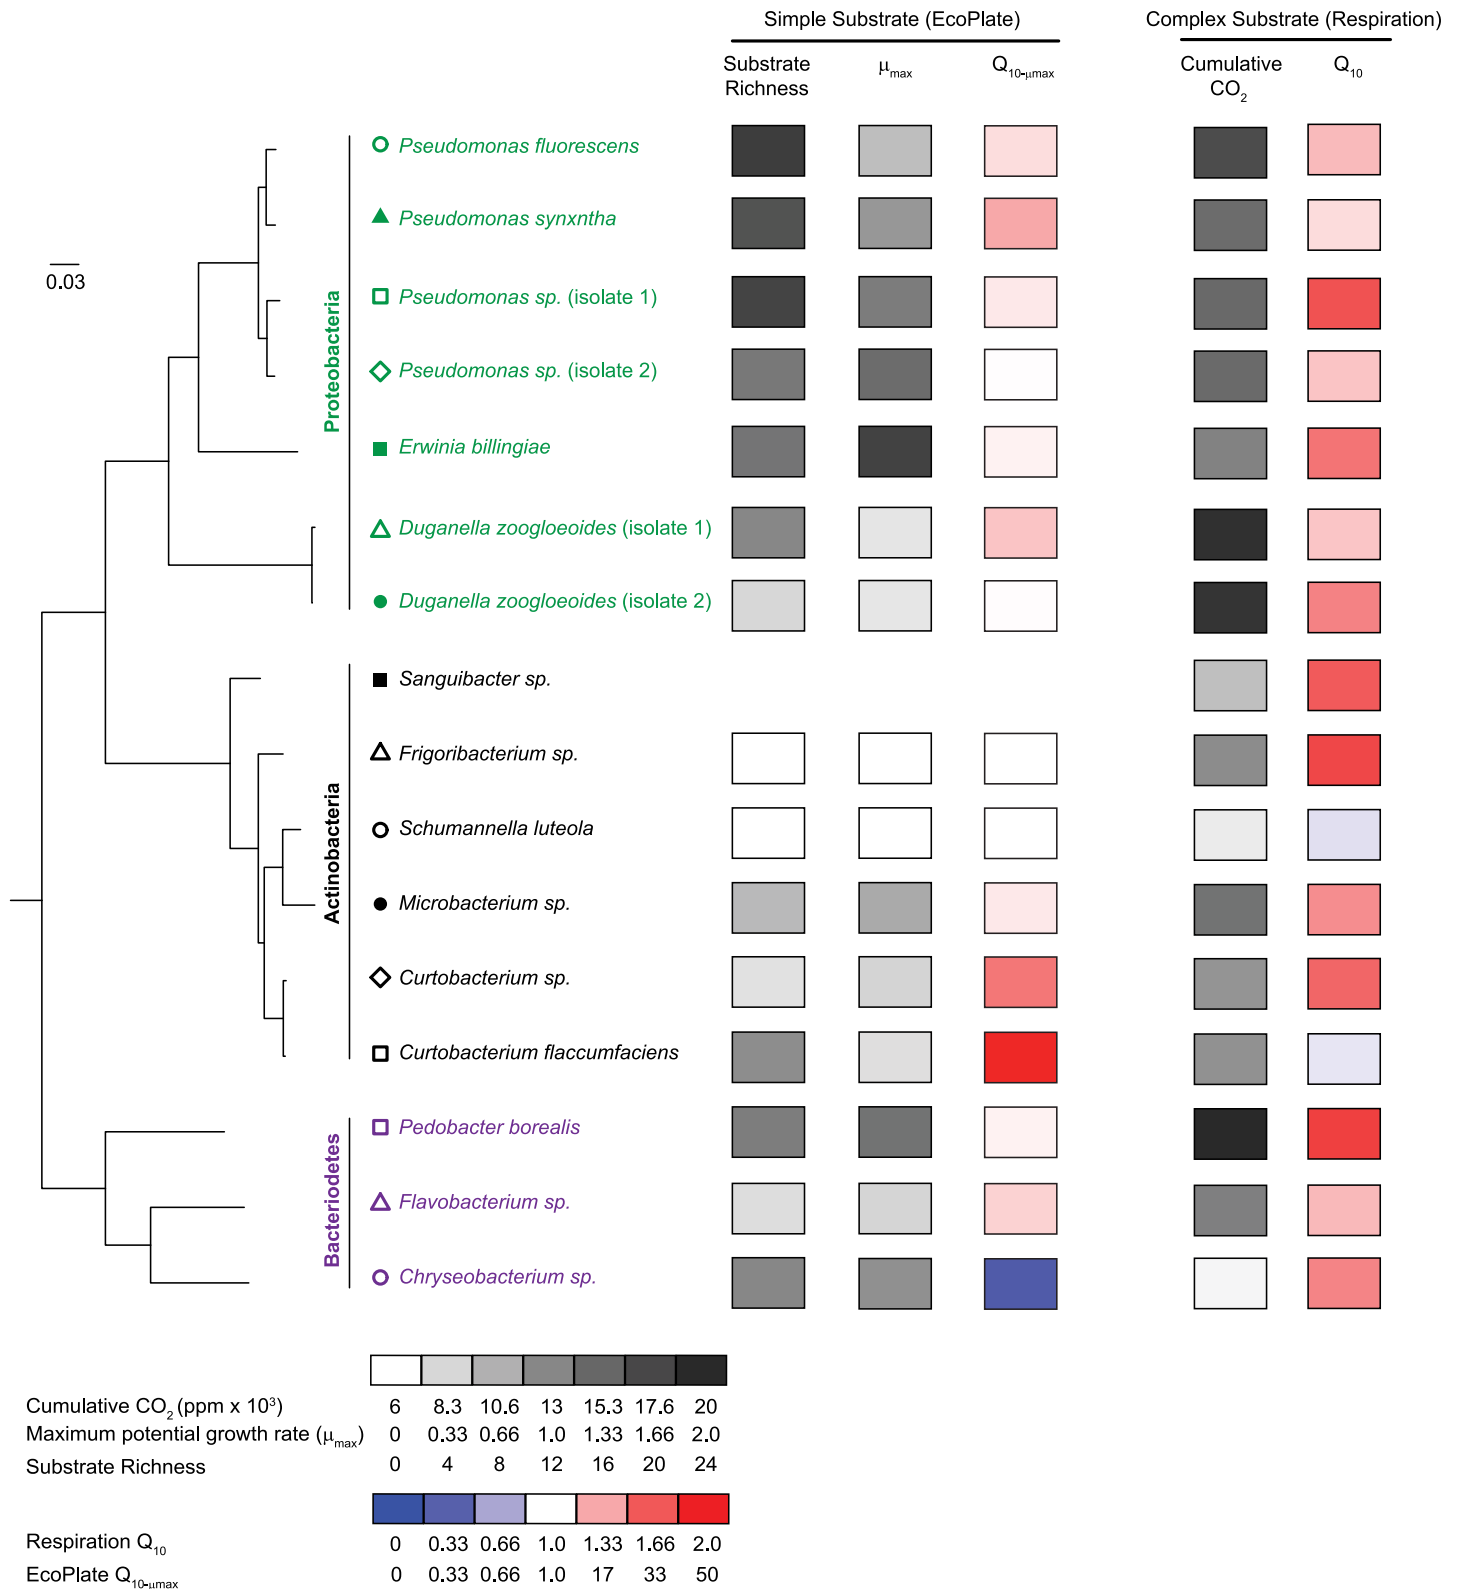

**Fig 5. Phylogenetic tree of bacterial isolates with functional and response traits.** Maximum likelihood phylogenetic tree of bacterial isolates based on the majority consensus of 100 bootstrap runs using Phylip. Isolate names shown in green, black, and purple belong to phyla Proteobacteria, Actinobacteria, and Bacterioidetes, respectively. Symbols next to each isolate name match those used in Fig 6. Plotted next to each isolate is the summary of functional and response traits for simple and complex substrates. All functional traits are based on the mean value across all temperatures and, when applicable, EcoPlate substrates.

<https://doi.org/10.1371/journal.pone.0174472.g005>

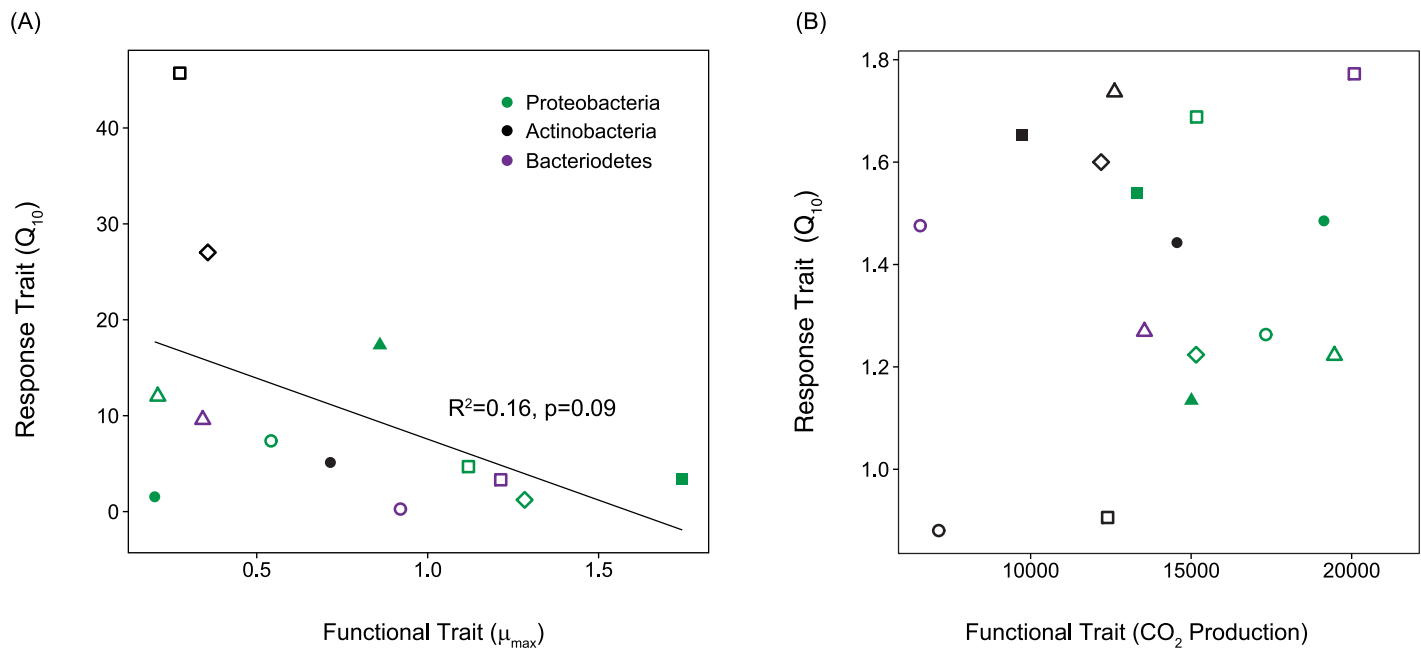

**Fig 6. Functional and response trait correlation.** Correlation between the functional traits (A)  $\mu_{max}$  and (B) cumulative  $CO_2$  production and each trait's sensitivity to temperature ( $Q_{10}$ ). Each isolate is represented by a unique symbol and corresponds to the symbols used in Fig 5. Symbols shown in green, black, and purple represent isolates belonging to the phyla Proteobacteria, Actinobacteria, and Bacteroidetes, respectively.

<https://doi.org/10.1371/journal.pone.0174472.g006>

were phylogenetically conserved (Table 3), but these significant correlations did not appear to be related to substrate type (polymer, amino acid, etc.).

### Correlations between substrate use & temperature response

The functional and response traits of the litter bacteria were generally not correlated. An isolate's average  $\mu_{max}$  tended to be negatively related with  $Q_{10-\mu_{max}}$ , but this pattern was not statistically significant ( $R^2 = 0.16, p = 0.09$ ; Fig 6A). We also found no correlation between an isolate's average  $CO_2$  production rate and its sensitivity to temperature ( $Q_{10}$ ; Fig 6B). Functional and response traits were generally orthogonal to one another in a PCA ordination (S4 Fig).

### Discussion

Our co-occurring leaf litter bacteria varied substantially in their substrate use abilities. While this variation has been previously documented (as seen in [46–48]), there are surprisingly few studies that assay such parameters for isolates isolated from the same community. Although trait values revealed in a laboratory setting may not translate to real-world conditions, these data reveal an estimate of the distribution of traits in a particular community and the breadth of occupied niche space [49]. Such data can also be used to parameterize trait-based models that predict how microbial communities, and their ecosystem functions, will respond to changing environmental conditions (e.g. [50–53]).

The simple substrate assays used in our study revealed a large range in potential substrate use among leaf litter bacterial taxa. Indeed, some isolates appeared to specialize on a small number of substrates, while others metabolized a much higher number. The use of the Eco-Plate system to analyze microbial traits is not without its weaknesses. Simple substrates do not cover the whole diversity of potential substrates that can be found in leaf litter, and microbial

activity in the EcoPlate may not be identical to that in nature. Despite these weaknesses, we observed that isolates that utilized more EcoPlate substrates also had higher rates of CO<sub>2</sub> production on complex leaf litter ( $R^2 = 0.08$ ,  $p = 0.05$ ).

Changes in temperature also influenced the bacteria's ability to utilize simple and complex carbon substrates as previously observed (reviewed in [12]). For example,  $u_{\max}$  and substrate use richness of the *Chryseobacterium* sp. isolate (family Flavobacteriaceae) increased with temperature. Indeed, earlier studies demonstrated that many strains of *Chryseobacterium* can grow at temperatures as high as 37°C [54]. On the other hand, the substrate use richness of both *Curtobacterium* isolates (family Microbacteriaceae) decreased with temperature.

While warmer temperatures generally increase decomposition rates through a combination of increased enzymatic activity, metabolism, and growth (increased abundance) [2, 55, 56], we observed mixed responses to increasing temperatures. In general, the usage of simple carbon substrates (via EcoPlates) decreased with temperature, although the decomposition of complex leaf litter mildly increased with temperature. Unlike many other studies [55, 57, 58], we measured temperature response using a relatively narrow temperature range. This narrow temperature range, and focus on more labile substrates, could have hindered our ability to measure an accurate temperature effect. Other studies have demonstrated that the decomposition of labile compounds is generally less sensitive to changes in temperature [59]. Many, if not all, of the EcoPlate substrates used in this study are relatively labile compounds. In addition, it's likely that the CO<sub>2</sub> produced in our microcosm assay was mineralized from labile substrates, as these are the first targets of decomposition. If this is the case, conducting similar experiments on more recalcitrant substrates will be essential to assessing microbial responses to environmental change.

As hypothesized, the ability of the leaf litter taxa to utilize substrates was partially phylogenetically conserved. This was the case whether we analyzed simple substrates (via EcoPlates) or natural, more complex, leaf litter. However, contrary to our expectation that these traits would only be finely-conserved, we observed a phylogenetic pattern across broad taxonomic lineages. For example, isolates belonging to the phyla Proteobacteria, on average, utilized more substrates and had higher decomposition rates than isolates belonging to the phyla Actinobacteria and Bacteroidetes (Fig 5). These Proteobacteria (class  $\gamma$ -Proteobacteria and  $\beta$ -Proteobacteria) are generally characterized as fast growers that target lower molecular weight (more labile) compounds [60–63]. In contrast, the response of both Actinobacteria and Bacteroidetes to soil carbon substrates appears mixed [62, 63].

Unlike substrate usage, we found that temperature response did not appear to be phylogenetically conserved. This is in contrast to our hypothesis and previous studies, which have observed environmental conditions like light and moisture availability to result in the phylogenetic, clustering of microbial communities (e.g. [32, 64]). In this system in particular, we previously observed significantly conserved responses to drought and nitrogen addition in the field, at least among closely related taxa (<0.4% similar in 16S sequence [33]). However, this example also raises the possibility that the temperature response is similarly conserved at a fine genetic scale. In other words, the adaptation to minor temperature changes might evolve on shorter time scales and involve simpler traits, resulting in a relatively shallow level of conservation [35]. In this case, our selection of 16 isolates across three phyla reduced our ability to detect a phylogenetic signal at finer genetic scales (within phyla), and limits our ability to pinpoint the depth of conservation (e.g., using metric such as consenTRAIT [31]).

Contrary to our final hypothesis, we did not detect a correlation between the functional traits and temperature response of these leaf litter bacteria. A correlation between functional and response traits might indicate a physiological tradeoff, as organisms are often constrained by their ability to maximize every trait. One evolutionary consequence of physiological

tradeoffs is organisms that exist along a continuum of life strategies, from stress-tolerant, slow-growing generalists to fast-growing but more susceptible specialists. For instance, Fig 1 depicts a scenario where taxa that have higher decomposition rates at 18°C respond less to increases in temperature. However, we found that the leaf litter isolates that utilized a larger set of substrates (i.e., more generalist life-strategies) were no more or less sensitive to temperature changes than isolates that utilized fewer substrates (i.e. specialist life-strategies) (Figs 4 and 6). While many of an organism's traits are expected to be correlated (for instance, plant leaf traits [65], the mechanism driving trait linkage varies. For example, trait correlations could be due to biological or physical tradeoffs (e.g., size and nutrient uptake in phytoplankton [8]). In addition, these patterns could also be produced when the same genes influence multiple traits (i.e. pleiotropy).

Although accompanied by recognized biases, culture-based studies offer a path for characterizing the distribution of traits in a microbial community and its response to changing environmental conditions. These microbial trait distributions can also be incorporated into models that predict how climate change will influence ecosystem functioning [66–68]. As this area of research grows, future studies should determine whether the phylogenetic patterns observed here apply to other microbial communities (residing on leaf litter or other environments). Further work should also evaluate if the responses of particular taxa to environmental change vary in different ecosystems. Overall, these types of studies will improve our understanding of how functional and response traits are distributed in a microbial community, and may help predict how composition, and microbial-controlled ecosystem functions, will shift in response to future environmental change.

## Supporting information

**S1 Fig. Substrate use richness for each isolate.** The number of substrates utilized by the bacterial isolates across the three temperatures.

(EPS)

**S2 Fig. Substrate use richness at each temperature.** Substrate use richness for all bacterial isolates for each temperature treatment. N = 15 for each temperature treatment.

(EPS)

**S3 Fig. Decomposition rates for each bacterial isolate.** Cumulative CO<sub>2</sub> production rates for each bacterial isolate across three temperature treatments. N = 3 for each box.

(EPS)

**S4 Fig. Principle Coordinates Analysis (PCA) of functional and response traits.** PCA ordination based on Euclidian distances of normalized functional and response traits. All functional traits are based on the mean value across all temperatures and, when applicable, EcoPlate substrates. The color of the symbols represent the phyla: Proteobacteria (green), Actinobacteria (black), or Bacteroidetes (purple). Symbols correspond to those shown in Fig 5.

(EPS)

**S1 Dataset. Biolog EcoPlate and decomposition data.** Raw microcosm and CO<sub>2</sub> production data for all isolates across three temperature treatments.

(XLSX)

## Acknowledgments

We thank Steven Nguyen for assistance in developing the EcoPlate protocols and Claudia Weihe for aiding in data collection.

## Author Contributions

**Conceptualization:** KLD JBHM SDA.

**Data curation:** KLD.

**Formal analysis:** KLD.

**Funding acquisition:** KLD SDA JBHM.

**Investigation:** KLD.

**Methodology:** KLD.

**Project administration:** KLD JP.

**Resources:** JBHM SDA.

**Supervision:** KLD JBHM.

**Visualization:** KLD.

**Writing – original draft:** KLD.

**Writing – review & editing:** KLD JBHM SDA.

## References

1. CEC. Global Climate Change and California: Potential Implications for Ecosystems, Health, and the Economy—Consultant Report. Publication# 500-03-058CF, California Energy Commission. 2003.
2. Sheik CS, Beasley WH, Elshahed MS, Zhou XH, Luo YQ, Krumholz LR. Effect of warming and drought on grassland microbial communities. *Isme J.* 2011; 5(10):1692–700. <https://doi.org/10.1038/ismej.2011.32> PMID: 21451582
3. Castro HF, Classen AT, Austin EE, Norby RJ, Schadt CW. Soil Microbial Community Responses to Multiple Experimental Climate Change Drivers. *Applied and Environmental Microbiology.* 2010; 76(4):999–1007. <https://doi.org/10.1128/AEM.02874-09> PMID: 20023089
4. Yuste JC, Penuelas J, Estiarte M, Garcia-Mas J, Mattana S, Ogaya R, et al. Drought-resistant fungi control soil organic matter decomposition and its response to temperature. *Global Change Biology.* 2011; 17(3):1475–86.
5. Schlesinger WH, Andrews JA. Soil respiration and the global carbon cycle. *Biogeochemistry.* 2000; 48(1):7–20.
6. Swift MJ, Heal OW, Anderson JM. Decomposition in terrestrial ecosystems. Oxford: Blackwell Scientific Publications; 1979. 384 p.
7. Green JL, Bohannan BJM, Whitaker RJ. Microbial biogeography: From taxonomy to traits. *Science.* 2008; 320(5879):1039–43. <https://doi.org/10.1126/science.1153475> PMID: 18497288
8. Litchman E, Klausmeier CA. Trait-Based Community Ecology of Phytoplankton. *Annual Review of Ecology Evolution and Systematics.* 2008; 39:615–39.
9. Wallenstein MD, Hall EK. A trait-based framework for predicting when and where microbial adaptation to climate change will affect ecosystem functioning. *Biogeochemistry.* 2012; 109(1–3):35–47.
10. Fierer N, Barberan A, Laughlin DC. Seeing the forest for the genes: using metagenomics to infer the aggregated traits of microbial communities. *Frontiers in microbiology.* 2014; 5.
11. Lavorel S, Garnier E. Predicting changes in community composition and ecosystem functioning from plant traits: revisiting the Holy Grail. *Functional Ecology.* 2002; 16(5):545–56.
12. Bradford MA. Thermal adaptation of decomposer communities in warming soils. *Frontiers in microbiology.* 2013; 4.
13. Srivastava DS, Cadotte MW, MacDonald AAM, Marushia RG, Mirotnick N. Phylogenetic diversity and the functioning of ecosystems. *Ecol Lett.* 2012; 15(7):637–48. <https://doi.org/10.1111/j.1461-0248.2012.01795.x> PMID: 22583836
14. Diaz S, Purvis A, Cornelissen JHC, Mace GM, Donoghue MJ, Ewers RM, et al. Functional traits, the phylogeny of function, and ecosystem service vulnerability. *Ecology and evolution.* 2013; 3(9):2958–75. <https://doi.org/10.1002/ece3.601> PMID: 24101986

15. Garnier E, Cortez J, Billes G, Navas ML, Roumet C, Debussche M, et al. Plant functional markers capture ecosystem properties during secondary succession. *Ecology*. 2004; 85(9):2630–7.
16. Williams NM, Crone EE, Roulston TH, Minckley RL, Packer L, Potts SG. Ecological and life-history traits predict bee species responses to environmental disturbances. *Biol Conserv*. 2010; 143(10):2280–91.
17. Suding KN, Lavorel S, Chapin FS, Cornelissen JHC, Diaz S, Garnier E, et al. Scaling environmental change through the community-level: a trait-based response-and-effect framework for plants. *Global Change Biology*. 2008; 14(5):1125–40.
18. Allison SD, Martiny JBH. Resistance, resilience, and redundancy in microbial communities. *Proceedings of the National Academy of Sciences of the United States of America*. 2008; 105:11512–9. <https://doi.org/10.1073/pnas.0801925105> PMID: 18695234
19. Potts DL, Suding KN, Winston GC, Rocha AV, Goulden ML. Ecological effects of experimental drought and prescribed fire in a southern California coastal grassland. *Journal of Arid Environments*. 2012; 81:59–66.
20. Alster CJ, German DP, Lu Y, Allison SD. Microbial enzymatic responses to drought and to nitrogen addition in a southern California grassland. *Soil Biology & Biochemistry*. 2013; 64:68–79.
21. Matulich KL, Weihe C, Allison SD, Amend AS, Berlemont R, Goulden ML, et al. Temporal variation overshadows the response of leaf litter microbial communities to simulated global change. *The ISME journal*. 2015; 9(11):2477–89. Epub 2015/05/16. <https://doi.org/10.1038/ismej.2015.58> PMID: 25978544
22. Allison SD, Lu Y, Weihe C, Goulden ML, Martiny AC, Treseder KK, et al. Microbial abundance and composition influence litter decomposition response to environmental change. *Ecology*. 2013; 94(3):714–25. Epub 2013/05/22. PMID: 23687897
23. Strickland MS, Lauber C, Fierer N, Bradford MA. Testing the functional significance of microbial community composition. *Ecology*. 2009; 90(2):441–51. PMID: 19323228
24. Matulich KL, Martiny JBH. Microbial composition alters the response of litter decomposition to environmental change. *Ecology*. 2015; 96(1):154–63. PMID: 26236900
25. Cavender-Bares J, Kozak KH, Fine PV, Kembel SW. The merging of community ecology and phylogenetic biology. *Ecol Lett*. 2009; 12(7):693–715. Epub 2009/05/29. <https://doi.org/10.1111/j.1461-0248.2009.01314.x> PMID: 19473217
26. Philippot L, Andersson SG, Battin TJ, Prosser JI, Schimel JP, Whitman WB, et al. The ecological coherence of high bacterial taxonomic ranks. *Nature reviews Microbiology*. 2010; 8(7):523–9. Epub 2010/06/10. <https://doi.org/10.1038/nrmicro2367> PMID: 20531276
27. Langille MG, Zaneveld J, Caporaso JG, McDonald D, Knights D, Reyes JA, et al. Predictive functional profiling of microbial communities using 16S rRNA marker gene sequences. *Nature biotechnology*. 2013; 31(9):814–21. Epub 2013/08/27. <https://doi.org/10.1038/nbt.2676> PMID: 23975157
28. Tan J, Pu Z, Ryberg WA, Jiang L. SPECIES PHYLOGENETIC RELATEDNESS, PRIORITY EFFECTS, AND ECOSYSTEM FUNCTIONING. *Ecology*. 2011.
29. Cadotte MW, Cardinale BJ, Oakley TH. Evolutionary history and the effect of biodiversity on plant productivity. *Proceedings of the National Academy of Sciences of the United States of America*. 2008; 105(44):17012–7. <https://doi.org/10.1073/pnas.0805962105> PMID: 18971334
30. Keiser AD, Strickland MS, Fierer N, Bradford MA. The effect of resource history on the functioning of soil microbial communities is maintained across time. *Biogeosciences*. 2011; 8(6):1477–86.
31. Martiny AC, Treseder K, Pusch G. Phylogenetic conservatism of functional traits in microorganisms. *The ISME journal*. 2013; 7(4):830–8. Epub 2012/12/14. <https://doi.org/10.1038/ismej.2012.160> PMID: 23235290
32. Evans SE, Wallenstein MD. Climate change alters ecological strategies of soil bacteria. *Ecol Lett*. 2014; 17(2):155–64. <https://doi.org/10.1111/ele.12206> PMID: 24261594
33. Amend AS, Martiny AC, Allison SD, Berlemont R, Goulden ML, Lu Y, et al. Microbial response to simulated global change is phylogenetically conserved and linked with functional potential. *The ISME journal*. 2016; 10(1):109–18. <https://doi.org/10.1038/ismej.2015.96> PMID: 26046258
34. Jain R, Rivera MC, Lake JA. Horizontal gene transfer among genomes: The complexity hypothesis. *Proceedings of the National Academy of Sciences of the United States of America*. 1999; 96(7):3801–6. PMID: 10097118
35. Martiny JB, Jones SE, Lennon JT, Martiny AC. Microbiomes in light of traits: A phylogenetic perspective. *Science*. 2015; 350(6261):aac9323. Epub 2015/11/07. <https://doi.org/10.1126/science.aac9323> PMID: 26542581
36. Grime JP. Evidence for the Existence of Three Primary Strategies in Plants and Its Relevance to Ecological and Evolutionary Theory. *The American naturalist*. 1977; 111(982):1169–94.



37. Agrawal AA, Conner JK, Rasmann S. Tradeoffs and negative correlations in evolutionary ecology. In: Bell MA, Eanes WF, Futuyma DJ, Levinton JS, editors. *Evolution After Darwin: the First 150 Years*. Sunderland, MA: Sinauer Associates; 2010.
38. Edwards U, Rogall T, Blocker H, Emde M, Bottger EC. Isolation and Direct Complete Nucleotide Determination of Entire Genes—Characterization of a Gene Coding for 16s-Ribosomal Rna. *Nucleic Acids Research*. 1989; 17(19):7843–53. PMID: [2798131](https://pubmed.ncbi.nlm.nih.gov/2798131/)
39. Wang Q, Garrity GM, Tiedje JM, Cole JR. Naive Bayesian classifier for rapid assignment of rRNA sequences into the new bacterial taxonomy. *Applied and Environmental Microbiology*. 2007; 73(16):5261–7. <https://doi.org/10.1128/AEM.00062-07> PMID: [17586664](https://pubmed.ncbi.nlm.nih.gov/17586664/)
40. Pruesse E, Peplies J, Glockner FO. SINA: Accurate high-throughput multiple sequence alignment of ribosomal RNA genes. *Bioinformatics*. 2012; 28(14):1823–9. <https://doi.org/10.1093/bioinformatics/bts252> PMID: [22556368](https://pubmed.ncbi.nlm.nih.gov/22556368/)
41. Felsenstein J. PHYLIP (Phylogeny Inference Package). 2006.
42. Mougnot C, Kawamura R, Matulich KL, Berlemont R, Allison SD, Amend AS, et al. Elemental stoichiometry of Fungi and Bacteria strains from grassland leaf litter. *Soil Biology & Biochemistry*. 2014; 76:278–85.
43. Zwietering MH, Jongenburger I, Rombouts FM, Vantriet K. Modeling of the Bacterial-Growth Curve. *Applied and Environmental Microbiology*. 1990; 56(6):1875–81. PMID: [16348228](https://pubmed.ncbi.nlm.nih.gov/16348228/)
44. Baker NR, Allison SD. Ultraviolet photodegradation facilitates microbial litter decomposition in a Mediterranean climate. *Ecology*. 2015.
45. Conant RT, Drijber RA, Haddix ML, Parton WJ, Paul EA, Plante AF, et al. Sensitivity of organic matter decomposition to warming varies with its quality. *Global Change Biology*. 2008; 14(4):868–77.
46. Romani AM, Fischer H, Mille-Lindblom C, Tranvik LJ. Interactions of bacteria and fungi on decomposing litter: Differential extracellular enzyme activities. *Ecology*. 2006; 87(10):2559–69. PMID: [17089664](https://pubmed.ncbi.nlm.nih.gov/17089664/)
47. Allison SD, LeBauer DS, Ofrecio MR, Reyes R, Ta AM, Tran TM. Low levels of nitrogen addition stimulate decomposition by boreal forest fungi. *Soil Biology & Biochemistry*. 2009; 41(2):293–302.
48. Lebauer DS. Litter degradation rate and beta-glucosidase activity increase with fungal diversity. *Canadian Journal of Forest Research-Revue Canadienne De Recherche Forestiere*. 2010; 40(6):1076–85.
49. Lennon JT, Aanderud ZT, Lehmkuhl BK, Schoolmaster DR. Mapping the niche space of soil microorganisms using taxonomy and traits. *Ecology*. 2012; 93(8):1867–79. PMID: [22928415](https://pubmed.ncbi.nlm.nih.gov/22928415/)
50. Allison SD. A trait-based approach for modelling microbial litter decomposition. *Ecol Lett*. 2012; 15(9):1058–70. <https://doi.org/10.1111/j.1461-0248.2012.01807.x> PMID: [22642621](https://pubmed.ncbi.nlm.nih.gov/22642621/)
51. Bouskill NJ, Tang J, Riley WJ, Brodie EL. Trait-based representation of biological nitrification: model development, testing, and predicted community composition. *Frontiers in microbiology*. 2012; 3:364. Epub 2012/10/23. <https://doi.org/10.3389/fmicb.2012.00364> PMID: [23087681](https://pubmed.ncbi.nlm.nih.gov/23087681/)
52. Scheiter S, Langan L, Higgins SI. Next-generation dynamic global vegetation models: learning from community ecology. *The New phytologist*. 2013; 198(3):957–69. Epub 2013/03/19. <https://doi.org/10.1111/nph.12210> PMID: [23496172](https://pubmed.ncbi.nlm.nih.gov/23496172/)
53. Follows MJ, Dutkiewicz S. Modeling diverse communities of marine microbes. *Annual review of marine science*. 2011; 3:427–51. Epub 2011/02/19. <https://doi.org/10.1146/annurev-marine-120709-142848> PMID: [21329212](https://pubmed.ncbi.nlm.nih.gov/21329212/)
54. Vandamme P, Bernardet JF, Segers P, Kersters K, Holmes B. New Perspectives in the Classification of the Flavobacteria—Description of *Chryseobacterium* Gen-Nov, *Bergeyella* Gen-Nov, and *Empedobacter* Nom Rev. *International Journal of Systematic Bacteriology*. 1994; 44(4):827–31.
55. Ratkowsky DA, Olley J, Mcmeekin TA, Ball A. Relationship between Temperature and Growth-Rate of Bacterial Cultures. *J Bacteriol*. 1982; 149(1):1–5. PMID: [7054139](https://pubmed.ncbi.nlm.nih.gov/7054139/)
56. Lloyd J, Taylor JA. On the Temperature-Dependence of Soil Respiration. *Functional Ecology*. 1994; 8(3):315–23.
57. Bradford MA, Watts BW, Davies CA. Thermal adaptation of heterotrophic soil respiration in laboratory microcosms. *Global Change Biology*. 2010; 16(5):1576–88.
58. Fierer N, Craine JM, McLauchlan K, Schimel JP. Litter quality and the temperature sensitivity of decomposition. *Ecology*. 2005; 86(2):320–6.
59. Suseela V, Tharayil N, Xing B, Dukes JS. Labile compounds in plant litter reduce the sensitivity of decomposition to warming and altered precipitation. *The New phytologist*. 2013; 200(1):122–33. Epub 2013/07/05. <https://doi.org/10.1111/nph.12376> PMID: [23822593](https://pubmed.ncbi.nlm.nih.gov/23822593/)
60. Treseder KK, Kivlin SN, Hawkes CV. Evolutionary trade-offs among decomposers determine responses to nitrogen enrichment. *Ecol Lett*. 2011; 14(9):933–8. <https://doi.org/10.1111/j.1461-0248.2011.01650.x> PMID: [21749597](https://pubmed.ncbi.nlm.nih.gov/21749597/)

61. Elsas JDv, Jansson JK, Trevors JT. *Modern soil microbiology*. 2nd ed. Boca Raton, FL: CRC Press/Taylor & Francis; 2007. 646 p., 24 p. of plates p.
62. Fierer N, Bradford MA, Jackson RB. Toward an ecological classification of soil bacteria. *Ecology*. 2007; 88(6):1354–64. Epub 2007/07/03. PMID: [17601128](#)
63. Goldfarb KC, Karaoz U, Hanson CA, Santee CA, Bradford MA, Treseder KK, et al. Differential growth responses of soil bacterial taxa to carbon substrates of varying chemical recalcitrance. *Frontiers in microbiology*. 2011; 2:94. <https://doi.org/10.3389/fmicb.2011.00094> PMID: [21833332](#)
64. Moore LR, Rocap G, Chisholm SW. Physiology and molecular phylogeny of coexisting *Prochlorococcus* ecotypes. *Nature*. 1998; 393(6684):464–7. Epub 1998/06/12. <https://doi.org/10.1038/30965> PMID: [9624000](#)
65. Wright IJ, Reich PB, Westoby M, Ackerly DD, Baruch Z, Bongers F, et al. The worldwide leaf economics spectrum. *Nature*. 2004; 428(6985):821–7. <https://doi.org/10.1038/nature02403> PMID: [15103368](#)
66. Todd-Brown KEO, Hopkins FM, Kivlin SN, Talbot JM, Allison SD. A framework for representing microbial decomposition in coupled climate models. *Biogeochemistry*. 2012; 109(1–3):19–33.
67. Hararuk O, Smith MJ, Luo Y. Microbial models with data-driven parameters predict stronger soil carbon responses to climate change. *Glob Chang Biol*. 2014. Epub 2014/12/17.
68. Wieder WR, Bonan GB, Allison SD. Global soil carbon projections are improved by modelling microbial processes. *Nat Clim Change*. 2013; 3(10):909–12.
